# Supplementary material for: Mouse models of Loa loa
Source: PubMed Central journal article supplement (PMC6441053; doi:10.1038/s41467-019-09442-0), 2019-03-29
Supplement: 41467_2019_9442_MOESM4_ESM.pdf [file 41467_2019_9442_MOESM4_ESM.pdf]

## **Description of Additional Supplementary Files**

File Name: Supplementary Movie 1

Description: Loa males and females in ex vivo cultures derived from a single NOD.SCIDyc  $-/-$  mouse, 5 months post-infection

File Name: Supplementary Movie 2

Description: Ruptured female Loa worm and liberated uterine-released contents, including motile mf, in ex vivo culture derived from a NOD.SCIDyc  $-/-$  mouse, 5 months post-infection

File Name: Supplementary Movie 3

Description: Migrating Loa adult worm under the skin of a BALB/c RAG2  $-/-$  mouse seven days post-implantation

File Name: Supplementary Movie 4

Description: Motile Loa adult worm within subcutaneous tissue at necropsy, one month post-implantation of a BALB/c RAG2  $-/-$  mouse
